# Supplementary material
Source: PubMed Central journal article supplement (PMC2922257)
Supplement: 1006007107_pnas.1006007107_SI.pdf [file 1006007107_pnas.1006007107_SI.pdf]

# Supporting Information

Sinha Roy et al. 10.1073/pnas.1006007107

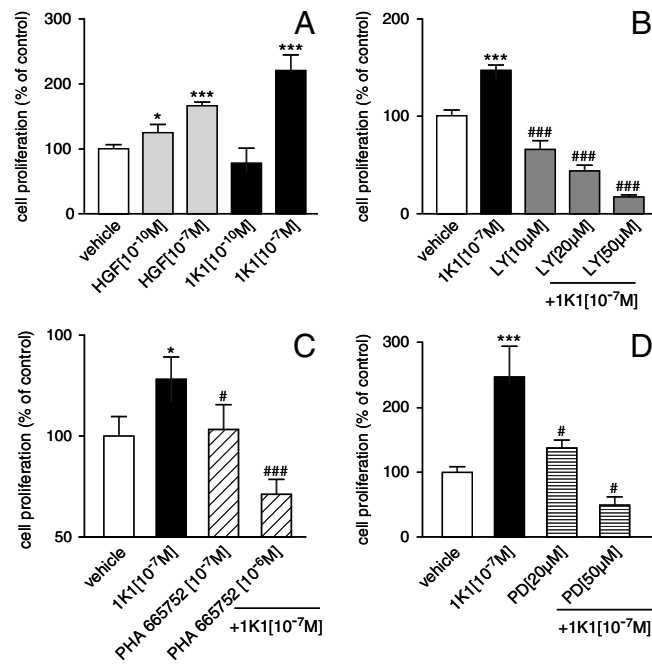

**Fig. S1.** (A) Human Umbilical Vein Endothelial Cells (HUVECs) proliferation in presence of HGF/SF and 1K1 at two different concentrations ( $10^{-10}$  M and  $10^{-7}$  M). (B) Effect of PI3 kinase inhibitor, LY294002, on 1K1-induced cell proliferation at 24 h. (C) Effect of Met inhibitor, PHA 665752, on 1K1-induced HUVECs proliferation at 48 h. (D) Effect of MAP kinase inhibitor, PD98059, on 1K1-induced HUVECs proliferation at 72 h. The data represent mean  $\pm$  SEM from  $n = 3$ . \*\*\*  $P < 0.001$  vs vehicle-treated control; \*  $P < 0.05$  vs vehicle-treated control; ###  $P < 0.001$  vs 1K1[ $10^{-7}$  M]; #  $P < 0.05$  vs 1K1[ $10^{-7}$  M].
